# Supplementary material for: Surface ion transfer growth of ternary CdS1−xSex quantum dots and their electron transport modulation
Source: Royal Society of Chemistry journal article supplement (doi:10.1039/c2nr31703f), 2012-01-01
Supplement: c2nr31703f.pdf [file c2nr31703f.pdf]

## Supporting Information

### Surface Ions Transfer Growth of Ternary CdS<sub>1-x</sub>Se<sub>x</sub> Quantum Dots and Their Electron Transport Modulations

*Zhenhua Chen, Wenqin Peng, Kun Zhang, Jing Zhang, Masatoshi Yanagida and Liyuan Han\**

Photovoltaic Materials Unit, National Institute for Materials Science (NIMS), Tsukuba, Ibaraki, 305-0047, Japan.

\* Corresponding author: [han.liyuan@nims.go.jp](mailto:han.liyuan@nims.go.jp) (L. Y. Han); [chen.zhenhua@nims.go.jp](mailto:chen.zhenhua@nims.go.jp) (Z. H. Chen)

**Figure S1.** EDX spectrum of ternary CdS<sub>1-x</sub>Se<sub>x</sub> QDs.

**Figure S2.** Tauc's law employed to evaluate the optical bandgaps of the CdS<sub>1-x</sub>Se<sub>x</sub> QDs.

**Figure S3.** Normalized absorbance spectrum of as-prepared and annealed CdS<sub>1-x</sub>Se<sub>x</sub> QDs.

**Figure S4.** Cross-section image and corresponding elemental linescan mapping of CdS<sub>1-x</sub>Se<sub>x</sub> QDs sensitized TiO<sub>2</sub> photoelectrode.

**Figure S5.** EIS spectra and equivalent circuit CdS, CdS<sub>1-x</sub>Se<sub>x</sub>, and CdSe QDSSCs.

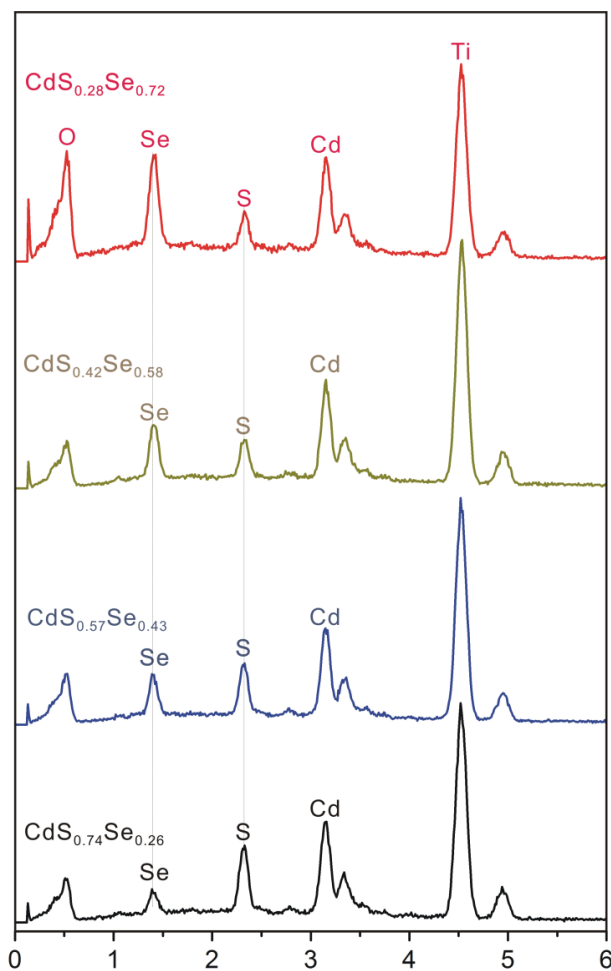

**Figure S1.** EDX spectrum of ternary CdS<sub>1-x</sub>Se<sub>x</sub> QDs, with specific elemental peaks.

These peaks are as follows: Titanium K<sub>α</sub>=4.51 keV and K<sub>β</sub>=4.93 keV, Oxygen K<sub>α</sub>=0.52 keV, Cadmium L<sub>α</sub>=3.13 keV and L<sub>β</sub>=3.31 keV, Sulfur K<sub>α</sub>=2.37 keV and Selenium L<sub>α</sub>=1.37 keV. The value of Se/(S+Se) is 0.26, 0.43, 0.58 and 0.72 for CdS<sub>0.74</sub>Se<sub>0.26</sub> QDs, CdS<sub>0.57</sub>Se<sub>0.43</sub> QDs, CdS<sub>0.42</sub>Se<sub>0.58</sub> QDs and CdS<sub>0.28</sub>Se<sub>0.72</sub> QDs.

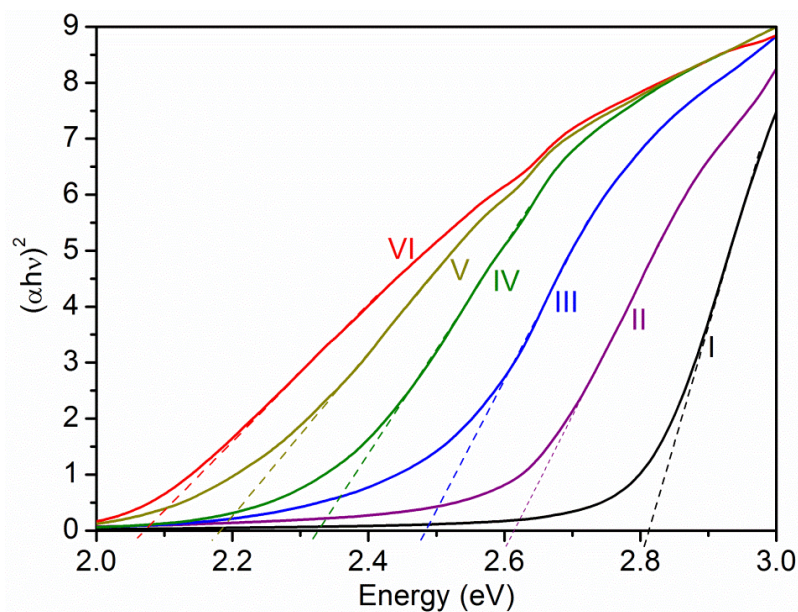

**Figure S2.** Tauc's law was employed to evaluate the optical bandgaps of the  $\text{CdS}_{1-x}\text{Se}_x$  QDs. The plots of  $(\alpha h\nu)^2$  Vs.  $h\nu$  are presented in for pristine CdS QDs (curve I) and  $\text{CdS}_{1-x}\text{Se}_x$  QDs with Se content of 0.26, 0.43, 0.58, 0.72 and 1 (curve II to VI), where  $\alpha$  is the absorption coefficient,  $h\nu$  is photon energy,  $E_g$  is the energy band gap, and A is a constant.<sup>1,2</sup> The illustrate estimation of the bandgaps have values of 2.82, 2.48, 2.62, 2.32, 2.18 and 2.06 eV, respectively.

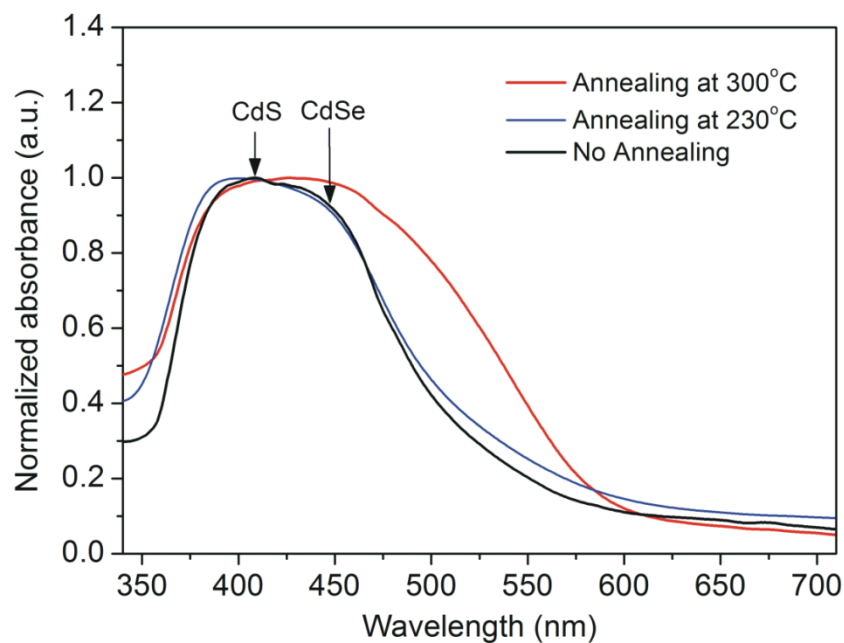

**Figure S3.** Normalized absorbance spectrum of as-prepared and annealed CdS<sub>1-x</sub>Se<sub>x</sub> QDs. The red shift of the spectrum can be observed when the QDs were annealed at 300°C, due to the dissolve and enlarger of QDs, while it is no obvious shift when they were annealed at 230°C. The as-prepared QDs in RT have two individual peaks which attribute to both CdS and CdSe. The peak was merged after annealing at 230°C due to lattice charge and formation of ternary alloy structure.

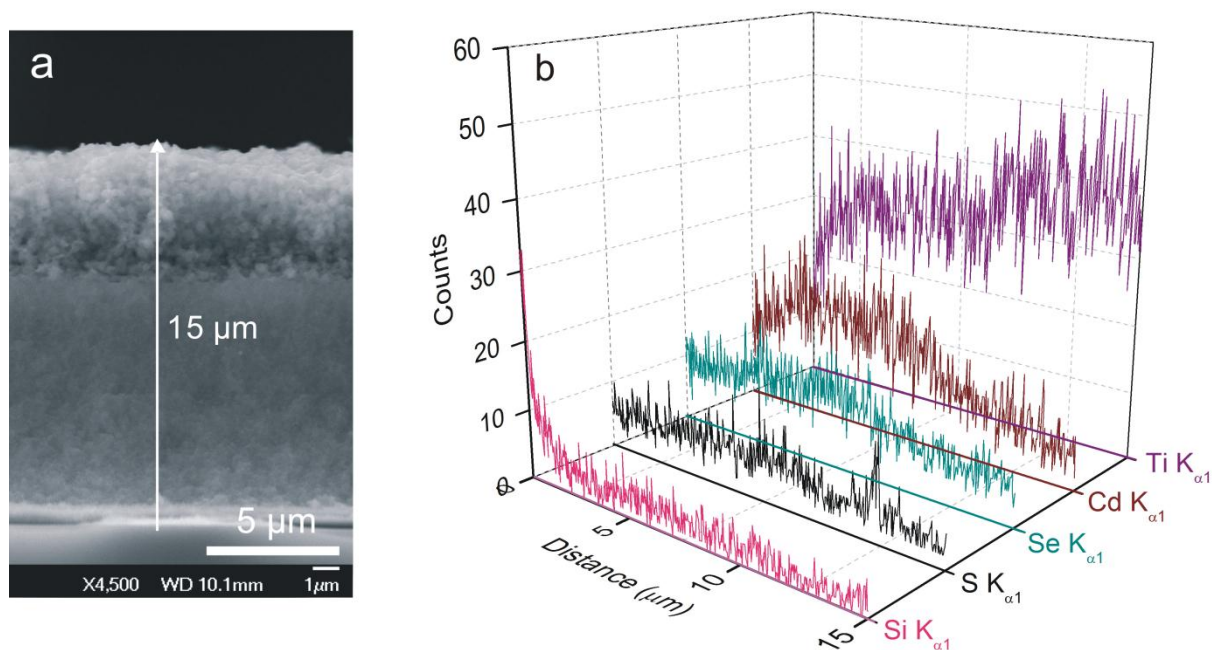

**Figure S4.** (a) Cross-section image and (b) corresponding elemental linescan mapping of 15 μm CdS<sub>1-x</sub>Se<sub>x</sub> QDs sensitized TiO<sub>2</sub> photoelectrode. The line scan of Si, S, Se, Cd and Ti were conducted from bottom-to-up, as the arrow indicated in figure S4(a). The obvious higher concentration of the Cd elements within the 10 μm dense TiO<sub>2</sub> film is attributed to the more efficient loading of QDs in dense TiO<sub>2</sub> films. The dramatically increasing of Si is attributed to the bottom glass substrate.

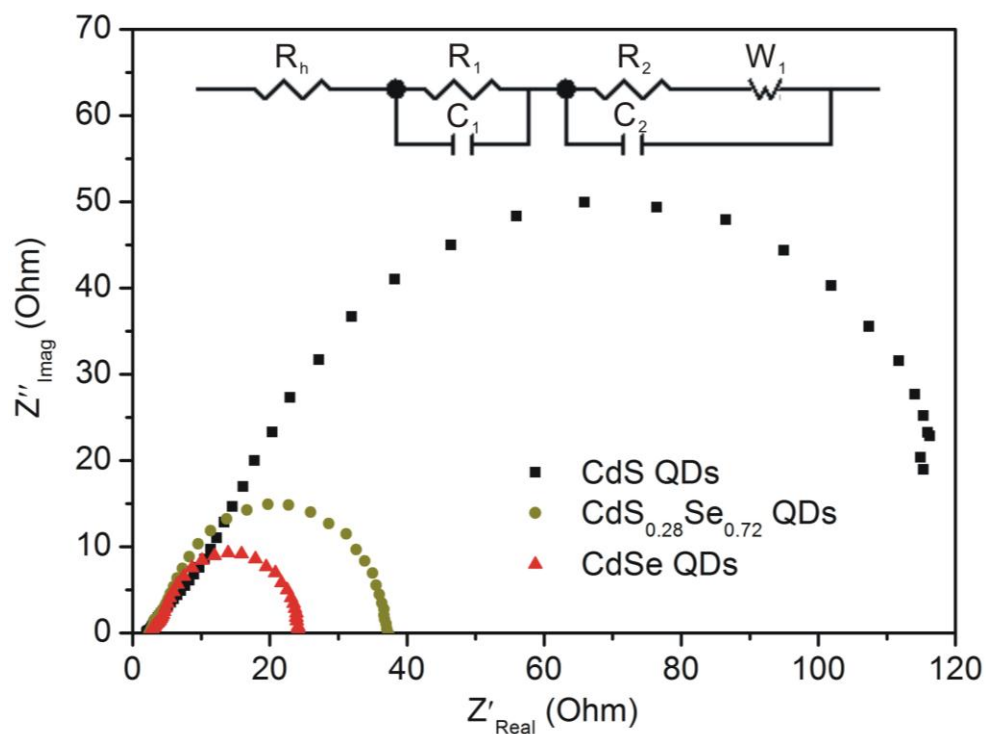

**Figure S5.** EIS spectra of CdS, CdS<sub>1-x</sub>Se<sub>x</sub>, and CdSe QDSSCs measured under 100 mW/cm<sup>2</sup> illumination. The inset is a scheme of equivalent circuit used to model the experimental data.

## References

1. J. Tauc, R. Grigorovici, A. Vancu, *Phys. Status Solidi* 1966, **15**, 627.
2. R. W. Collins, C. Y. Huang, *Phys. Rev. B* 1986, **34**, 2910.
